# Supplementary material
Source: HighWire-hosted journal article supplement (https://www.annfammed.org/highwire/filestream/14999/field_highwire_adjunct_files/0/2021ReviewerNames.pdf)
Supplement: 2021ReviewerNames.pdf [file 2021ReviewerNames.pdf]

**2021 Reviewers:**

|                              |                        |                          |
|------------------------------|------------------------|--------------------------|
| Alan M. Adelman              | David Richard Brown    | William J. Curry         |
| Alicia Agnoli                | Roy E. Brown           | Timothy P. Daaleman      |
| Octavia Amaechi              | Timothy Callaghan      | Katrien Danhieux         |
| Félix Amiot                  | Edward J. Callahan     | John William Davis       |
| Ekaterina Anderson           | Marion Campbell        | Joshua Davis             |
| Marietta Angelotti           | Lucy M. Candib         | David de Berker          |
| Heather E. Angier            | Beth A. Careyva        | Barbara DiCicco-Bloom    |
| Brian T. Antono              | Pricivel M. Carrera    | Sean Duffy               |
| Bruce Arroll                 | Lawrence P. Casalino   | Ashten Ray Duncan        |
| Nancy J. Baker               | Anthony P. Catinella   | E. Jennifer Edelman      |
| Alanna Baldwin               | Bruce A. Center        | Duncan Alexander Edwards |
| Michael S. Barr              | Justin Chen            | Samuel T. Edwards        |
| Elizabeth A. Bayliss         | Dan C. Cherkin         | Jennifer Edwards-Johnson |
| Ronny Bell                   | Lance A. Chilton       | Azza Eissa               |
| Kristen L. Bene              | Marie-Hélène Chomienne | Nancy C. Elder           |
| Ian M. Bennett               | Elizabeth C. Clark     | Shellie D. Ellis         |
| Kathleen Bennett             | Lynn P. Clemow         | Bery J. Engebretsen      |
| Timothy J. Benton            | Alicia J. Cohen        | Kehinde T. Eniola        |
| Steve Blackwell              | Deborah J. Cohen       | Pilar A. Espinoza        |
| Jessica L. Bloom-Foster      | Benjamin J. Colburn    | Bella Etingen            |
| Barbara Bluestone Rothschild | Katie F. Coleman       | Joel F. Farley           |
| Alan M. Blum                 | Emil Nicolae Coman     | Joshua J. Fenton         |
| Thomas Bodenheimer           | George Donald Comerci  | Karen Elizabeth Ferguson |
| Jennifer Boggs               | Colleen M. Conry       | Edgar Figueroa           |
| David M. Bott                | Michael R. Cousineau   | Emanuele Filice          |
| Peter John Bower             | Anastasia Coutinho     | Leonardo Fontenelle      |
| Mylaine Breton               | Lauren A. Crain        | Anette Forss             |
| Daniel Lee Brinton           | Michael A. Crouch      | Krys E. Foster           |
|                              | Larry Culpepper        | George K. Freeman        |

|                         |                    |                       |
|-------------------------|--------------------|-----------------------|
| Joshua Freeman          | Eric Henley        | Benjamin Kaplan       |
| John J. Frey            | Joseph R. Herges   | Mamta Karani          |
| Vanessa Gamble          | Maia Hightower     | Jennifer Karlin       |
| Theodore G. Ganiats     | Swapnil Hiremath   | Louis A. Kazal        |
| Maria Esteli Garcia     | Richard M. Hoffman | Nancy L. Keating      |
| Brian Garvey            | Tory Hogan         | Charles M. Kilo       |
| Karleen F Giannitrapani | John H. Holmes     | Noa Kim               |
| Valerie J. Gilchrist    | Jeana Holt         | Victor Olaolu Kolade  |
| James M. Gill           | Young-Rock Hong    | Richelle J. Koopman   |
| David Goodrich          | Erika Hood         | Alex H. Krist         |
| Mara Gordon             | Tammy Hopper       | Philip J. Kroth       |
| Sarah Hall Gordon       | David Howard       | David Kuo             |
| Robin S. Gotler         | Carmel Hughes      | Elizabeth Kvach       |
| Venkata C. Gourineni    | Anne (Kate) Hust   | Judy Lalmuanpuii      |
| Larry A. Green          | Carmine U Iacono   | Francesco Lapi        |
| Lee Albert Green        | Laurie Claire Ivey | Aaron Lear            |
| Matthew Griffith        | Yalda Jabbarpour   | JoAnn E. Leavey       |
| Alyssa Grimshaw         | Carlos R. Jaen     | Sharon D. Lee         |
| Daniel Grossman         | Ecler Ercole Jaqua | Simon J. Craddock Lee |
| Kevin Grumbach          | Masahito Jimbo     | Wei-Ju Lee            |
| Timothy C Guetterman    | Michael E Johansen | Elizabeth Lee-Ray     |
| Aditi Gupta             | Eric A. Johnson    | F. Stuart Leeds       |
| David L. Hahn           | Robert E Johnson   | Elle Lett             |
| Simon Hambidge          | Kenton Johnston    | Bert M Leysen         |
| Melissa L. Harry        | Maura Jones        | Chao Li               |
| Daniel M. Hartung       | Linju Joseph       | Joshua M. Liao        |
| Md. Zabir Hasan         | Jennifer M. Joyce  | Winston R. Liaw       |
| Katie M. Heiden-Rootes  | Neil Kamdar        | Lee-Ling Lim          |
| Sarah Hemeida           | Ryan Kandrack      | Kenneth W. Lin        |

|                           |                      |                             |
|---------------------------|----------------------|-----------------------------|
| Susan Xiaoqin Lin         | Ann S. O'Malley      | Ellen B. Rubinstein         |
| Jennifer E. Lochner       | Shyam Odeti          | Grant M. Russell            |
| Paula Lozano              | Elizabeth Ogburn     | Roy T. Sabo                 |
| Jennifer A. Lucas         | Sally Okun           | Barbara Saltzman            |
| Michael K. Magill         | Rho Henry Olaisen    | Lewis G. Sandy              |
| Elizabeth M. Magnan       | Tamara K. Oser       | Barry G. Saver              |
| O'Neal T. Malcolm         | Alex Oyarzo          | Giacomo Scaioli             |
| Gina M. Many              | Wilson D. Pace       | Joseph E. Scherger          |
| Beesan Maraga             | Michael L. Parchman  | Jeffrey F. Scherrer         |
| Katherine L. Margo        | Ina U. Park          | John G. Scott               |
| Carrie McAdam-Marx        | Haridarshan Patel    | Dean A. Seehusen            |
| Todd Durant McDiarmid     | Parvathi Perumareddi | Paul Shafer                 |
| Rene J. McGovern          | Kevin A. Peterson    | Megha K. Shah               |
| M. Diane McKee            | Lars E. Peterson     | Babar Shaikh                |
| Richard Meenan            | Melissa A. Plegue    | Allen F. Shaughnessy        |
| David R. Mehr             | Kyle Possemato       | Jana Shaw                   |
| Stewart W. Mercer         | P.S.D.V. Prasadarao  | Xiaoming Sheng              |
| Kelly R. Miller           | Lee Radosh           | Kimberley I. Shoaf          |
| William L. Miller         | Jennifer M. Reckrey  | Navkiran K. Shokar          |
| Gretchen Lisa Mockler     | Kerry Reynolds       | Katharine Anne Sieck        |
| Mallory Moore             | Robert L. Rhyne      | Elisa Sobo                  |
| Matthew Motta             | Sharon Rikin         | Randi G. Sokol              |
| Zsolt J. Nagykaldi        | Jonathan Ripp        | Leif I. Solberg             |
| Hannah Neprash            | Cynthia M. Ripsin    | Hyun Jung Song              |
| Warren P. Newton          | Juan C. Robles       | Enrique Soto-Pérez-de-Celis |
| Max Jordan Nguemeni Tiako | José E. Rodríguez    | Nadia Sourial               |
| Jerome Niyirora           | Thomas C. Rosenthal  | Kurt C. Stange              |
| Allison A. Norful         | Kathleen Rowland     | Jonathan Stokes             |
| Patrick J. O'Connor       | Susan E. Rubin       | Jonas J. Swartz             |

Joelle Taknint  
Jonathan L. Temte  
Jeffrey O. Tom  
Anjali R. Truitt  
Jaw-Shiun Tsai  
Jennifer Tsui  
Joseph Tucker  
Laurene Tumiel-Berhalter  
Golfo Tzilos Wernette  
Peter Uhrbrand  
Ryan J. Urbanowicz  
Brisa Urquieta de Hernandez  
Linda van Eikenhorst  
Luke A. Vander Weide  
Aditi Vasan  
Pasitpon Vatcharavongvan  
Elizabeth M. Vaughan  
Bonnie M. Vest  
Jennifer Irvin Vidrine  
Tong Wang  
Xiaolin Wei  
Charlene Weir  
Erica Weiss  
Sherry H. Weitzen  
Richard C. Wender  
James J. Werner  
John M. Westfall  
Eric S. Williams  
Joshua Tyler Bonnema  
Williams  
Courtney M. Winterer  
Edwin S. Wong  
Adam Wright  
Zhou Yang  
Mark Yeazel  
Jonathan Yun  
Luis E. Zayas  
Philip Zazove  
Therese Zink  
Nicholas A. Zwar  
Miriam Zylberglait Lisigurski
